# Supplementary material
Source: PubMed Central journal article supplement (PMC6679817)
Supplement: NIHMS1517556-supplement-Supplemental_Digital_Content_to_Be_Published__cited_in_text_.pdf [file NIHMS1517556-supplement-Supplemental_Digital_Content_to_Be_Published__cited_in_text_.pdf]

**SUPPLEMENTAL DIGITAL CONTENT**

**Table S1.** International Classification of Disease, Ninth Revision, Clinical Modification (ICD-9-CM) diagnosis codes used to define medical diagnoses from billing claims data.

| <b>Diagnosis</b>      | <b>ICD-9-CM Diagnostic Codes</b>                                                                                                                                                                   |
|-----------------------|----------------------------------------------------------------------------------------------------------------------------------------------------------------------------------------------------|
| Hypotension           | 458, 458.9                                                                                                                                                                                         |
| Acute MI              | 410                                                                                                                                                                                                |
| Stroke                | 430, 431, 433.01, 433.11, 433.21, 433.31, 433.81, 433.91, 432, 433, 434, 434.01, 434.91, 434.11, 436, 997.02                                                                                       |
| Hypercapnia           | 276.4                                                                                                                                                                                              |
| Fungal Pneumonia      | 112.4, 114.0, 115.5, 484.6, 484.7, 039.1, 136.3, 021.2                                                                                                                                             |
| Aspiration pneumonia  | 507.0, 507.1, 507.8, 997.32                                                                                                                                                                        |
| Other pneumonia       | V12.61, 481, 482, 480.0, 482.1, 482.2, 482.9, 482.8, 482.83, 482.4, 482.41, 482.42, 482.3, 483, 484, 484.8, 485, 486, 136.3, 518.3, 039.1, 130.4, 011.6, 513.0, 055.1, 052.1                       |
| Alcohol abuse         | 303.0, 303.9, 305.0, 291.x, 571.0, 571.2, 571.3, 535.3                                                                                                                                             |
| Other drug abuse      | 304.2, 304.0, 304.7, 304.3, 304.1, 304.4, 304.5, 304.6, 304.8, 304.9, 305.6, 305.5, 305.2, 305.3, 305.4, 305.7, 305.8, 305.9, 292.x                                                                |
| Noncompliance         | V158.1                                                                                                                                                                                             |
| Mental status changes | 780.0, 780.01, 780.02, 780.03, 780.09, 800.x, 801.x, 803.x, 804.x, 850.x                                                                                                                           |
| Delusion              | 297, 297.0, 297.1, 297.2, 297.3, 297.8, 297.9,                                                                                                                                                     |
| Psychosis             | 298, 298.0, 298.1, 298.2, 298.3, 298.4, 298.8, 298.9, 293, 294                                                                                                                                     |
| Schizophrenia         | V11.0, 295.8, 295.0, 295.5, 295.9, 295, 295.7, 297, 295.4                                                                                                                                          |
| Depression            | V79.0, 296.2, 300.4, 296.3, 311, 309.28, 307.44, 309.0, 309.1                                                                                                                                      |
| Accidents             | E806, E807, E826, E827, E829, E830, E831, E836, E838, E841, E842, E844, E845, E916, E918, E921, E928, E928.x, E929, E929.x, V714                                                                   |
| Fractures             | V15.51, V13.51, V13.52, V67.4, 733.95, 823, 733.1, 800, 801, 802, 803, 804, 805, 806, 807, 809, 810, 811, 812, 813, 814, 815, 816, 817, 818, 819, 820, 821, 822, 823, 824, 825, 826, 827, 828, 829 |

**Table S2.** Adjusted associations of CODA with risks of DCGF, death, and ACGF in the first year posttransplant and >1 to 3 years after kidney transplant.

| Pretransplant CODA and outcomes first year posttransplant |                   |                    |                   | First year posttransplant and outcomes >1 to 3 years posttransplant |                    |                   |
|-----------------------------------------------------------|-------------------|--------------------|-------------------|---------------------------------------------------------------------|--------------------|-------------------|
|                                                           | DCGF<br>aHR (95%) | Death<br>aHR (95%) | ACGF<br>aHR (95%) | DCGF<br>aHR (95%)                                                   | Death<br>aHR (95%) | ACGF<br>aHR (95%) |
| CDOA                                                      | 1.00 (0.54–1.87)  | 1.09 (0.49–2.44)   | 1.10 (0.67–1.80)  | 2.29 (1.59–3.32)‡                                                   | 1.79 (1.06–3.04)*  | 2.09 (1.50–2.91)‡ |
| Age (years)                                               |                   |                    |                   |                                                                     |                    |                   |
| ≤18                                                       | 1.04 (0.67–1.62)  | 0.67 (0.28–1.60)   | 0.86 (0.58–1.27)  | 1.25 (0.99–1.58)                                                    | 0.55 (0.35–0.88)*  | 1.02 (0.84–1.25)  |
| 19-30                                                     | Reference         | Reference          | Reference         | Reference                                                           | Reference          | Reference         |
| 31-44                                                     | 0.79 (0.64–0.97)* | 1.73 (1.16–2.57)*  | 0.94 (0.78–1.13)  | 0.51 (0.45–0.59)‡                                                   | 1.14 (0.88–1.48)   | 0.59 (0.52–0.67)‡ |
| 45-59                                                     | 0.83 (0.67–1.03)  | 2.65 (1.79–3.92)‡  | 1.11 (0.92–1.34)  | 0.32 (0.27–0.37)‡                                                   | 2.03 (1.58–2.60)‡  | 0.55 (0.48–0.62)‡ |
| ≥60                                                       | 0.91 (0.61–1.36)  | 5.72 (3.40–9.61)‡  | 1.65 (1.21–2.25)* | 0.23 (0.18–0.29)‡                                                   | 3.59 (2.66–4.84)‡  | 0.74 (0.61–0.89)* |
| Male                                                      | 1.00 (0.87–1.14)  | 1.02 (0.88–1.17)   | 1.02 (0.92–1.12)  | 0.96 (0.86–1.06)                                                    | 0.92 (0.83–1.01)   | 0.93 (0.87–1.01)  |
| Race                                                      |                   |                    |                   |                                                                     |                    |                   |
| White                                                     | Reference         | Reference          | Reference         | Reference                                                           | Reference          | Reference         |
| Black                                                     | 1.18 (1.05–1.32)* | 0.83 (0.73–0.94)*  | 1.04 (0.95–1.14)  | 1.69 (1.52–1.88)‡                                                   | 0.74 (0.67–0.82)‡  | 1.12 (1.04–1.21)* |
| Hispanic                                                  | 0.88 (0.75–1.03)  | 0.66 (0.56–0.78)‡  | 0.78 (0.69–0.88)‡ | 0.87 (0.77–1.00)*                                                   | 0.61 (0.54–0.68)‡  | 0.73 (0.66–0.80)‡ |
| Other                                                     | 0.86 (0.66–1.13)  | 0.79 (0.61–1.03)   | 0.83 (0.68–1.01)  | 0.73 (0.60–0.90)*                                                   | 0.58 (0.49–0.69)‡  | 0.63 (0.55–0.72)‡ |
| BMI (kg/m <sup>2</sup> )                                  |                   |                    |                   |                                                                     |                    |                   |
| <18.5                                                     | 0.96 (0.68–1.34)  | 1.66 (1.20–2.30)*  | 1.23 (0.96–1.57)  | 0.87 (0.70–1.08)                                                    | 1.26 (0.99–1.61)   | 0.96 (0.81–1.14)  |
| 18.5-24.9                                                 | Reference         | Reference          | Reference         | Reference                                                           | Reference          | Reference         |
| 25-30                                                     | 1.22 (1.07–1.39)* | 0.97 (0.85–1.11)   | 1.07 (0.97–1.18)  | 1.11 (1.00–1.23)                                                    | 0.87 (0.79–0.95)*  | 0.97 (0.90–1.05)  |
| >30                                                       | 1.48 (1.27–1.72)‡ | 1.04 (0.89–1.23)   | 1.24 (1.11–1.39)† | 1.19 (1.06–1.32)*                                                   | 0.91 (0.83–1.01)   | 1.04 (0.96–1.12)  |
| Unknown                                                   | 1.17 (0.85–1.63)  | 1.56 (1.14–2.12)*  | 1.37 (1.09–1.73)* | 0.99 (0.78–1.26)                                                    | 0.88 (0.72–1.08)   | 0.97 (0.82–1.14)  |
| Cause of ESRD                                             |                   |                    |                   |                                                                     |                    |                   |
| Diabetes                                                  | 0.88 (0.74–1.05)  | 1.03 (0.88–1.22)   | 0.97 (0.86–1.10)  | 0.93 (0.76–1.14)                                                    | 1.29 (1.09–1.52)*  | 1.09 (0.95–1.25)  |
| Glomerulonephritis                                        | 0.98 (0.85–1.12)  | 0.74 (0.62–0.88)†  | 0.89 (0.80–1.00)* | Reference                                                           | Reference          | Reference         |
| Hypertension                                              | Reference         | Reference          | Reference         | 1.07 (0.95–1.20)                                                    | 1.34 (1.19–1.52)‡  | 1.16 (1.06–1.26)* |
| Polycystic kidney disease                                 | 0.63 (0.50–0.80)† | 0.59 (0.45–0.76)‡  | 0.63 (0.52–0.75)‡ | 0.70 (0.58–0.85)†                                                   | 0.81 (0.69–0.97)*  | 0.74 (0.65–0.85)‡ |
| Other                                                     | 0.95 (0.81–1.12)  | 0.96 (0.81–1.15)   | 0.95 (0.84–1.08)  | 0.80 (0.70–0.92)*                                                   | 1.11 (0.96–1.28)   | 0.86 (0.78–0.96)* |
| Dialysis duration (months)                                |                   |                    |                   |                                                                     |                    |                   |
| None                                                      | 0.57 (0.43–0.76)† | 0.61 (0.47–0.80)†  | 0.62 (0.51–0.76)‡ | 0.70 (0.60–0.82)‡                                                   | 0.78 (0.68–0.89)†  | 0.76 (0.69–0.85)‡ |

**Table S2, continued.** Adjusted associations of CODA with risks of DCGF, death, and ACGF in the first year posttransplant and >1 to 3 years after kidney transplant.

|                             |                   |                   |                    |                   |                   |                   |
|-----------------------------|-------------------|-------------------|--------------------|-------------------|-------------------|-------------------|
| >0-24                       | Reference         | Reference         | Reference          | Reference         | Reference         | Reference         |
| 25-60                       | 1.24 (1.08–1.42)* | 1.23 (1.08–1.42)* | 1.24 (1.12–1.37)‡  | 1.04 (0.93–1.15)  | 1.20 (1.10–1.32)† | 1.11 (1.03–1.20)* |
| >60                         | 1.62 (1.41–1.87)‡ | 1.75 (1.51–2.03)‡ | 1.66 (1.49–1.84)‡  | 1.03 (0.91–1.17)  | 1.51 (1.35–1.69)‡ | 1.23 (1.12–1.34)‡ |
| Missing                     | 4.13 (2.93–5.82)‡ | 1.55 (0.93–2.59)  | 2.81 (2.09–3.79)‡  | 0.73 (0.42–1.24)  | 1.73 (1.22–2.46)* | 1.32 (0.96–1.81)  |
| Comorbid conditions         |                   |                   |                    |                   |                   |                   |
| Diabetes                    | 0.98 (0.83–1.15)  | 1.37 (1.17–1.61)‡ | 1.13 (1.00–1.27) * | 0.96 (0.81–1.15)  | 1.40 (1.22–1.61)‡ | 1.17 (1.04–1.32)* |
| Angina                      | 1.11 (0.94–1.32)  | 1.26 (1.08–1.46)* | 1.19 (1.05–1.34) * | 1.11 (0.95–1.30)  | 1.26 (1.13–1.40)‡ | 1.22 (1.11–1.34)‡ |
| COPD                        | 1.39 (1.00–1.94)* | 1.74 (1.31–2.30)† | 1.57 (1.26–1.97) ‡ | 1.38 (0.96–1.97)  | 1.59 (1.26–2.00)† | 1.48 (1.19–1.83)† |
| Hypertension                | 0.96 (0.84–1.09)  | 0.98 (0.86–1.13)  | 0.96 (0.87–1.06)   | 0.90 (0.81–1.00)* | 0.87 (0.79–0.95)* | 0.91 (0.84–0.98)* |
| Cerebral vascular disease   | 1.16 (0.91–1.49)  | 1.02 (0.80–1.30)  | 1.10 (0.92–1.32)   | 1.04 (0.81–1.32)  | 1.30 (1.11–1.53)* | 1.15 (0.99–1.33)  |
| Peripheral vascular disease | 1.20 (0.97–1.48)  | 1.37 (1.14–1.64)† | 1.29 (1.12–1.50)†  | 0.97 (0.78–1.22)  | 1.35 (1.19–1.54)‡ | 1.24 (1.10–1.40)† |
| Education Level             |                   |                   |                    |                   |                   |                   |
| College & higher            | Reference         | Reference         | Reference          | Reference         | Reference         | Reference         |
| Grade/High schools          | 0.99 (0.89–1.11)  | 0.91 (0.81–1.02)  | 0.95 (0.88–1.03)   | 1.19 (1.06–1.32)* | 1.08 (0.98–1.19)  | 1.14 (1.05–1.23)* |
| Unknown                     | 0.92 (0.78–1.09)  | 0.95 (0.80–1.14)  | 0.96 (0.84–1.08)   | 1.02 (0.89–1.18)  | 1.04 (0.92–1.18)  | 1.03 (0.93–1.14)  |
| Employment                  |                   |                   |                    |                   |                   |                   |
| Working                     | 0.85 (0.72–0.99)* | 0.84 (0.71–1.00)* | 0.84 (0.75–0.95)*  | 0.92 (0.83–1.03)  | 0.72 (0.65–0.81)‡ | 0.85 (0.78–0.92)‡ |
| Not Working                 | Reference         | Reference         | Reference          | Reference         | Reference         | Reference         |
| Unknown                     | 0.96 (0.80–1.15)  | 0.95 (0.80–1.14)  | 0.99 (0.86–1.13)   | 0.81 (0.69–0.95)* | 0.89 (0.78–1.02)  | 0.89 (0.79–0.99)* |
| Physical Capacity           |                   |                   |                    |                   |                   |                   |
| No Limit                    | Reference         | Reference         | Reference          | Reference         | Reference         | Reference         |
| Limited                     | 1.06 (0.90–1.25)  | 1.49 (1.29–1.73)‡ | 1.25 (1.11–1.40)†  | 1.07 (0.92–1.24)  | 1.18 (1.05–1.32)* | 1.14 (1.03–1.26)* |
| Unknown                     | 1.08 (0.97–1.20)  | 1.19 (1.06–1.33)* | 1.11 (1.03–1.21)*  | 0.93 (0.85–1.03)  | 1.05 (0.96–1.14)  | 0.99 (0.93–1.06)  |
| Previous transplant         | 1.37 (1.16–1.62)† | 1.36 (1.13–1.63)† | 1.35 (1.19–1.54)‡  | 0.84 (0.61–1.16)  | 1.66 (1.37–2.02)‡ | 1.38 (1.16–1.65)† |
| Most Recent PRA             |                   |                   |                    |                   |                   |                   |
| 0-9                         | Reference         | Reference         | Reference          | Reference         | Reference         | Reference         |
| 10-79                       | 0.95 (0.84–1.08)  | 1.01 (0.88–1.15)  | 0.99 (0.90–1.09)   | 1.02 (0.91–1.13)  | 1.00 (0.90–1.10)  | 0.99 (0.92–1.07)  |
| ≥80                         | 1.12 (0.94–1.34)  | 1.13 (0.92–1.38)  | 1.10 (0.95–1.26)   | 1.17 (0.96–1.44)  | 1.13 (0.95–1.34)  | 1.11 (0.96–1.28)  |
| Missing                     | 0.80 (0.62–1.05)  | 0.95 (0.74–1.22)  | 0.85 (0.70–1.03)   | 1.22 (0.92–1.62)  | 0.99 (0.77–1.27)  | 1.11 (0.91–1.36)  |

**Table S2, continued.** Adjusted associations of CODA with risks of DCGF, death and ACGF in the first year posttransplant and >1 to 3 years after kidney transplant.

|                    |                   |                   |                   |                   |                   |                   |
|--------------------|-------------------|-------------------|-------------------|-------------------|-------------------|-------------------|
| HLA Mismatch       |                   |                   |                   |                   |                   |                   |
| Zero A, B, DR      |                   |                   |                   | 0.63 (0.52–0.77)‡ | 0.94 (0.82–1.08)  | 0.82 (0.73–0.93)* |
| Zero DR            |                   |                   |                   | 0.79 (0.69–0.90)† | 0.85 (0.76–0.96)* | 0.84 (0.77–0.93)† |
| Other MM           |                   |                   |                   | Reference         | Reference         | Reference         |
| Donor Type         |                   |                   |                   |                   |                   |                   |
| Living             |                   |                   |                   | 0.79 (0.70–0.89)† | 0.87 (0.77–0.97)* | 0.80 (0.74–0.88)‡ |
| SCD                |                   |                   |                   | Reference         | Reference         | Reference         |
| ECD                |                   |                   |                   | 1.75 (1.55–1.97)‡ | 1.40 (1.28–1.54)‡ | 1.47 (1.36–1.59)‡ |
| DCD                |                   |                   |                   | 0.94 (0.82–1.09)  | 1.08 (0.96–1.21)  | 1.01 (0.92–1.11)  |
| Year of Transplant |                   |                   |                   |                   |                   |                   |
| 2007-2010          | Reference         | Reference         | Reference         | Reference         | Reference         | Reference         |
| 2011-2015          | 0.71 (0.65–0.78)‡ | 0.88 (0.79–0.97)* | 0.79 (0.73–0.84)‡ | 0.75 (0.69–0.82)‡ | 0.98 (0.91–1.06)  | 0.88 (0.82–0.93)‡ |

Abbreviations: BMI, body mass index; CDOA, cannabis dependence or abuse; COPD, chronic obstructive pulmonary disease; DCD, donation after circulatory death; ECD, extended criteria donor; ESRD, end-stage renal disease; HLA, human leukocyte antigen; PRA, panel reactive antibody; SCD, standard criteria donor.

*P* values: \**P* < 0.05–0.002; †*P* = 0.001–0.0001; ‡*P* < 0.0001, for differences of distributions of clinical traits among patients with versus without CDOA.

“Other race” includes Asian, Native American, Pacific Islander, and multiracial.

**Table S3.** Associations of pretransplant CDOA with risk of DCGF, death, and ACGF in the first year posttransplant, adjusting for pretransplant alcohol abuse, other drug abuse, noncompliance, and other baseline factors.

| Outcome predictors | DCGF<br>aHR (95%) | Death<br>aHR (95%) | ACGF<br>aHR (95%) |
|--------------------|-------------------|--------------------|-------------------|
| CDOA               | 1.00 (0.54–1.87)  | 1.09 (0.49–2.44)   | 1.10 (0.67–1.80)  |
| CDOA               | 1.00 (0.53–1.86)  | 1.09 (0.49–2.44)   | 1.09 (0.67–1.79)  |
| Alcohol abuse      | 1.39 (0.74–2.58)  | 1.26 (0.65–2.43)   | 1.31 (0.81–2.11)  |
| CDOA               | 1.00 (0.54–1.87)  | 1.10 (0.49–2.45)   | 1.10 (0.67–1.80)  |
| Other drug abuse   | 0.95 (0.54–1.67)  | 0.83 (0.46–1.50)   | 0.89 (0.58–1.37)  |
| CDOA               | 1.00 (0.54–1.87)  | 1.08 (0.48–2.43)   | 1.09 (0.67–1.79)  |
| Noncompliance      | 1.00 (0.78–1.30)  | 1.21 (0.92–1.60)   | 1.10 (0.91–1.34)  |
| CDOA               | 1.00 (0.54–1.87)  | 1.09 (0.49–2.45)   | 1.10 (0.67–1.80)  |
| Alcohol abuse      | 1.39 (0.74–2.59)  | 1.26 (0.65–2.43)   | 1.31 (0.81–2.11)  |
| Other drug abuse   | 0.94 (0.53–1.67)  | 0.83 (0.46–1.50)   | 0.89 (0.58–1.37)  |
| CDOA               | 1.00 (0.54–1.87)  | 1.08 (0.48–2.42)   | 1.09 (0.67–1.79)  |
| Alcohol abuse      | 1.39 (0.74–2.59)  | 1.26 (0.65–2.43)   | 1.31 (0.81–2.11)  |
| Other abuse        | 0.94 (0.53–1.67)  | 0.83 (0.46–1.49)   | 0.89 (0.58–1.36)  |
| Noncompliance      | 1.00 (0.77–1.30)  | 1.22 (0.92–1.60)   | 1.10 (0.91–1.34)  |

Abbreviations: ACGF, all-cause graft failure; aHR, adjusted hazard ratio; CDOA, cannabis dependence or abuse; DCGF, death-censored graft failure.

Models are adjusted for other baseline factors, as in the primary analyses.

*P* values: \**P* < 0.05–0.002; †*P* = 0.001–0.0001; ‡*P* < 0.0001.

**Table S4.** Associations of posttransplant CDOA with risk of DCGF, death, and ACGF in >1 to 3 years posttransplant, adjusting for posttransplant alcohol abuse, other drug abuse, noncompliance, and other baseline factors.

| Outcome predictors | DCGF<br>aHR (95%) | Death<br>aHR (95%) | ACGF<br>aHR (95%) |
|--------------------|-------------------|--------------------|-------------------|
| CDOA               | 2.32 (1.60–3.36)‡ | 1.80 (1.06–3.05)*  | 2.11 (1.51–2.93)‡ |
| CDOA               | 2.27 (1.57–3.29)‡ | 1.78 (1.05–3.02)*  | 2.07 (1.49–2.87)‡ |
| Alcohol abuse      | 2.04 (1.20–3.46)* | 1.91 (1.31–2.81)†  | 1.96 (1.39–2.76)† |
| CDOA               | 2.24 (1.54–3.24)‡ | 1.58 (0.93–2.68)   | 1.95 (1.40–2.71)‡ |
| Other drug abuse   | 1.59 (1.09–2.33)* | 2.41 (1.85–3.14)‡  | 2.06 (1.62–2.61)‡ |
| CDOA               | 1.88 (1.30–2.73)† | 1.50 (0.88–2.55)   | 1.75 (1.25–2.44)† |
| Noncompliance      | 2.42 (2.05–2.84)‡ | 2.54 (2.19–2.95)‡  | 2.49 (2.20–2.81)‡ |
| CDOA               | 2.20 (1.52–3.19)‡ | 1.57 (0.92–2.67)   | 1.92 (1.37–2.67)† |
| Alcohol abuse      | 1.96 (1.16–3.33)* | 1.83 (1.24–2.68)*  | 1.86 (1.32–2.63)† |
| Other drug abuse   | 1.55 (1.05–2.27)* | 2.37 (1.82–3.09)‡  | 2.01 (1.59–2.56)‡ |
| CDOA               | 1.81 (1.25–2.63)* | 1.29 (0.76–2.20)   | 1.61 (1.15–2.24)* |
| Alcohol abuse      | 1.91 (1.13–3.24)* | 1.73 (1.18–2.53)*  | 1.82 (1.29–2.57)† |
| Other abuse        | 1.38 (0.94–2.03)  | 2.26 (1.73–2.95)‡  | 1.86 (1.47–2.36)‡ |
| Noncompliance      | 2.39 (2.03–2.81)‡ | 2.49 (2.15–2.89)‡  | 2.44 (2.16–2.76)‡ |

Abbreviations: ACGF, all-cause graft failure; aHR, adjusted hazard ratio; CDOA, cannabis dependence or abuse; DCGF, death-censored graft failure.

Models are adjusted for other baseline factors, as in the primary analyses.

P values: \* $P < 0.05$ – $0.002$ ; † $P = 0.001$ – $0.0001$ ; ‡ $P < 0.0001$ .
